# Supplementary material for: Effects of dietary restriction on genome stability are sex and feeding regimen dependent
Source: Royal Society of Chemistry journal article supplement (doi:10.1039/d2fo03138h), 2022-12-01
Supplement: d2fo03138h1.zip [file d2fo03138h1.zip]

## Sheet: g
	实验小鼠摄食量数据（单位均为g)
	Control diet																			Meal feeding																			Fasting
	saline									Cisp										saline									Cisp										saline								Cisp
	♀					♂				♀				♂						♀					♂				♀				♂						♀				♂				♀
	①	②	③	④		①	②	③		①	②	③		①	②	③	④			①	②	③	④		①	②	③		①	②	③		①	②	③	④			①	②	③		①	②	③		①	②	③
1	4.48	8.1	5.93	5.93		5.82	5.17	7.18		4	8.08	5.98		12.09	7.29	11.22	7.17			4.78	3.62	6.05	6.08		6.7	4.78	5.54		6	8.08	3.92		9.44	5.74	8.5	7.13			8.07	8.06	5.9		12.09	6.1	6.63		8.07	5.2	5.9
2	7.05	7.91	6.02	6.17		8.1	7.04	6.98		8.04	8.16	6.08		11.81	5.45	8.86	7.1			5.05	5	6.11	6.03		6.57	5.38	5.58		8.22	8.16	6.01		6.49	5.91	9.3	5.45
3	6.23	8.14	5.85	5.82		7.98	5.22	6.84		7.35	8.18	5.81		11.9	6.11	7.22	7.15			5.64	7.97	5.9	5.99		7.01	5.47	5.82		3.54	8.06	4.69		6.6	6.84	9.97	5.51			7.88	7.94	5.9		12.1	7.13	7.06		8.05	6.02	6
4	4.88	8.2	6	6.08		8.29	4.11	6.08		7.08	8.02	5.99		7.98	5.06	8.86	7.09			5.2	7.5	5.85	6.86		7.29	4.64	5.83		6.84	8	4.78		4.4	6.21	7.17	6.4
5	7.33	8.14	5.49	5.64		6.79	5.35	6.67		5.2	7.92	6.17		7.62	5.73	7.44	7.1			4.95	8.02	5.97	7.04		7.83	5.12	6.52		7.07	8.01	5.95		5.03	6.21	7.04	7			7.9	8.03	7.19		12.1	6.94	6.88		8.16	5.9	6.2
6	6.83	7.93	5.99	5.45		6.53	6.59	7.04		6.3	7.99	5.97		7.55	5.17	5.79	7.04			4.61	7.96	5.42	6.9		8.02	5.44	6.36		6.31	7.97	4.42		5.68	6.7	8.64	6.16											8.09
7	5.42	8.19	4.45	5.46		6.59	4.32	6.97		6.77	8.09	6.06		8.6	6.02	6.47	6.95			5.53	8.03	5.71	7.02		6.75	5.31	6.41		6.25	8.2	4.81		5	6.52	7.5	5.5			7.98	7.94	7		11.9	7.06	7.24		8.08	5.99	6.01
8	6.92	7.93	5.95	5.12		6.54	5.24	6.93		6.12	8.03	6.16		7.33	5.9	5.99	6.92			6.04	7.94	4.79	5.74		6.96	5.14	5.98		5.09	8.14	4.62		4.99	6.37	6.47	6.24
9	5.22	8.07	4.87	5.54		6.64	4.79	6.75		6.15	8.14	6.15		10.96	5.65	6.27	7.16			6.27	8.02	5.18	4.99		7.7	4.64	5.5		6.51	8.09	5.1		6.31	5.6	6.71	5.5			7.91	8.16	7.02		11.89	6.99	6.95		7.98	6.02	5.94
10	5.83	7.92	6.37	4.13		7.69	5.62	6.47		5.96	7.91	6.81		9	5.9	7.33	8.15			6.6	8.1	5.81	5.01		7.95	5.48	6.21		6.97	7.95	5.59		7.21	4.67	8.43	5.12
11	4.71	8.06	5.24	4.34		5.6	3.77	6.82		4.68	8.01	7.3		10.42	6.16	6.76	7.65			4.93	7.93	5.09	5.33		3.86	4.45	5		6.02	8.01	4		4.39	5.33	7.75	6.01			8.05	8.05	7.01		12.09	8.41	8.97		8.07	7.93	6.28
12	5.64	8.03	5.11	4.18		7.05	5.52	7.41		8.02	7.9	8.15		7.51	5.88	6.48	7.03			6.72	8.08	5.23	4.15		7.41	5.74	5.45		7.08	8.16	4.33		6.37	5.02	6.78	6.1
13	6.44	8.1	5.23	4.23		5.81	5.74	7.03		5.57	8.12	7.75		10.72	5.99	7.78	6.99			6.06	8.18	4.81	4.29		7.45	5.77	5.76		5.62	8	4.52		6.34	5.2	8.12	6.7			8.07	7.9	4.18		12.01	8.9	9.18		8.1	7.58	6.96
14	3.93	8.03	4.72	4.31		7.26	5.12	6.41		5.5	8.2	7.14		9.31	6.09	7.8	7.26			5.4	8.06	4.94	4.29		9.65	4.79	5.69		6.37	8.16	4.81		5.35	5.31	8.06	5.4
15	6.74	7.92	5.63	4.29		8.86	5.06	7.24		6.9	7.97	7.39		9.67	6.12	7.62	6.85			5.87	7.98	5.34	4.23		7.03	5.68	4.85		6.38	8.16	5.41		6.3	5.4	7.31	5.96			10.08	8.19	4.25		12.12	9.13	9.04		8.13	8.17	8.1
16	6.09	8.18	5.82	4.34		6.94	4.27	6.83		5.44	8.14	6.75		7.78	6.07	7.04	6.13			6.15	8.04	4.85	4.43		7.33	4.78	5.63		6.21	8.2	5.17		7.27	6.08	7.99	5.8
17	5.38	7.96	7.16	4.28		8.01	5.45	7.28		6.68	8.17	6.81		7.65	5.99	6.36	6.08			6.63	7.98	4.69	4.35		7.49	5.52	5.78		5.59	8.02	5		6.73	4.94	8.01	5.82			10.04	8	4.4		11.99	8.14	8.03		8.17	7.03	6.99
18	5.77	7.83	5.69	4.32		7.34	5.32	8.17		5.77	8	6.91		8.74	6.16	6.45	7.19			5.9	7.92	5.23	4.26		6.61	5.14	4.99		6.2	7.99	5.12		6.05	6.06	7.93	5.31
19	4.93	7.93	5.31	4.17		6.44	4.77	7.74		5.39	8.09	6.83		9.54	6.17	5.03	6.22			5.63	8.1	4.78	4.48		6.11	5.13	5.18		5.81	7.95	4.22		4.87	5.72	6.27	5.81			9.93	8.05	4.4		12	7.96	8.17		8.11	7.05	7.16
20	5.71	8.11	4.51	4.24		6.41	4.56	6.07		6.7	8.01	5.43		7.95	6.15	5.97	5.39			4.6	7.92	4.72	4.22		6.64	4.41	4.29		6.98	7.91	4.43		5.73	6.01	6.75	5.19
21	6.67	8.04	5.72	4.1		8.09	5.29	7.36		5.57	7.97	6.52		8.41	6.12	5.15	6.15			5.22	8.02	4.79	4.21		6.91	4.67	4.4		6.36	7.01	5.9		5.75	5.02	6.78	4.68			10.04	8.1	4.26		11.34	7.9	8.18		8.1	7.16	7.18
22	5.35	8.1	5.47	4.2		8.16	4.52	7.37		7.02	7.95	6.9		8.45	6.18	6.68	4.61			4.62	8.07	5.32	4.2		5.53	5.44	4.71		5.11	8.17	5.38		6.06	4.95	7.43	5.28
23	5.05	8.1	5.45	4.28		6.63	4.97	6.9		5.12	8.14	6.49		8.08	6.05	6.3	4.7			4.57	8	4.75	4.18		6.43	5.35	4.92		5.13	8.03	3.92		6.29	5.61	6.53	4.76			9.92	8.05	4.18		10.09	8.04	8.11		8.09	6.95	6.92
24	5.59	7.97	5.7	4.3		7.75	4.84	6.46		5.57	8.17	6.34		7.03	6.07	7.1	5.5			4.38	8.11	5.21	4.25		6.37	4.8	4.6		5.93	8.16	3.43		5.33	5.28	8.03	4.77
25	4.17	8.06	4.88	4.27		7.11	4.15	6.33		5.87	8.06	5.14		8.53	6.08	6.1	4.87			4.79	7.99	4.75	4.35		6.11	4.62	5.01		5.73	7.96	3.56		5.89	5.43	8.16	4.66			9.85	8.09	4.3		11.93	8.14	8.12		8.13	7.09	7.14
26	6.16	8	5.45	4.36		6.73	4.73	6.35		5.22	7.99	5.84		9.12	5.95	6.26	5.09			5.44	8.03	5.02	4.44		5.89	4.73	4.68		5.07	7.98	5.03		5.96	5.21	8.13	4.44
27	5.2	8.04	4.16	4.35		6.97	4.73	7.02		5.72	8.03	4.83		8.52	6.09	5.9	6.13			6.11	7.87	3.71	4.35		5.93	5.09	5.64		5.44	7.96	5.02		4.85	4.74	7.74	4.63			10.17	7.94	4.38		11.98	7.95	7.91		7.94	6.97	6.93
28	5.18	7.94	5.33	4.48		6.85	4.5	5.82		5.09	8.18	5.08		8.24	6.1	6.57	6.33			4.69	8.12	4.94	4.41		6.05	4.46	5.18		4.72	8.16	4.99		4.45	5.2	6.53	4.31
29	4	8.06		4.46		7.34				1.71	8.04			6.58	6.19	7.34				5.36	8.03		4.48		5.95				2.9	8.05			3.98	4.38	7.62				9.9	7.94	4.43		11.84				8.12
30		8.17		4.53							8				6.12	6.35					8.05		4.52							8.04				4.93	6.92
31				4.66											6.02								4.57											4.98							4.54

## Sheet: kcal
	1	4.48	8.1	5.93	5.93		5.82	5.17	7.18		4	8.08	5.98		12.09	7.29	11.22	7.17			4.78	3.62	6.05	6.08		6.7	4.78	5.54		6	8.08	3.92		9.44	5.74	8.5	7.13			8.07	8.06	5.9		12.09	6.1	6.63		8.07	5.2
	2	7.05	7.91	6.02	6.17		8.1	7.04	6.98		8.04	8.16	6.08		11.81	5.45	8.86	7.1			5.05	5	6.11	6.03		6.57	5.38	5.58		8.22	8.16	6.01		6.49	5.91	9.3	5.45			0	0	0		0	0	0		0	0
	3	6.23	8.14	5.85	5.82		7.98	5.22	6.84		7.35	8.18	5.81		11.9	6.11	7.22	7.15			5.64	7.97	5.9	5.99		7.01	5.47	5.82		3.54	8.06	4.69		6.6	6.84	9.97	5.51			7.88	7.94	5.9		12.1	7.13	7.06		8.05	6.02
	4	4.88	8.2	6	6.08		8.29	4.11	6.08		7.08	8.02	5.99		7.98	5.06	8.86	7.09			5.2	7.5	5.85	6.86		7.29	4.64	5.83		6.84	8	4.78		4.4	6.21	7.17	6.4			0	0	0		0	0	0		0	0
	5	7.33	8.14	5.49	5.64		6.79	5.35	6.67		5.2	7.92	6.17		7.62	5.73	7.44	7.1			4.95	8.02	5.97	7.04		7.83	5.12	6.52		7.07	8.01	5.95		5.03	6.21	7.04	7			7.9	8.03	7.19		12.1	6.94	6.88		8.16	5.9
	6	6.83	7.93	5.99	5.45		6.53	6.59	7.04		6.3	7.99	5.97		7.55	5.17	5.79	7.04			4.61	7.96	5.42	6.9		8.02	5.44	6.36		6.31	7.97	4.42		5.68	6.7	8.64	6.16			0	0	0		0	0	0		0	0
	7	5.42	8.19	4.45	5.46		6.59	4.32	6.97		6.77	8.09	6.06		8.6	6.02	6.47	6.95			5.53	8.03	5.71	7.02		6.75	5.31	6.41		6.25	8.2	4.81		5	6.52	7.5	5.5			7.98	7.94	7		11.9	7.06	7.24		8.08	5.99
	8	6.92	7.93	5.95	5.12		6.54	5.24	6.93		6.12	8.03	6.16		7.33	5.9	5.99	6.92			6.04	7.94	4.79	5.74		6.96	5.14	5.98		5.09	8.14	4.62		4.99	6.37	6.47	6.24			0	0	0		0	0	0		0	0
	9	5.22	8.07	4.87	5.54		6.64	4.79	6.75		6.15	8.14	6.15		10.96	5.65	6.27	7.16			6.27	8.02	5.18	4.99		7.7	4.64	5.5		6.51	8.09	5.1		6.31	5.6	6.71	5.5			7.91	8.16	7.02		11.89	6.99	6.95		7.98	6.02
	10	5.83	7.92	6.37	4.13		7.69	5.62	6.47		5.96	7.91	6.81		9	5.9	7.33	8.15			6.6	8.1	5.81	5.01		7.95	5.48	6.21		6.97	7.95	5.59		7.21	4.67	8.43	5.12			0	0	0		0	0	0		0	0
	11	4.71	8.06	5.24	4.34		5.6	3.77	6.82		4.68	8.01	7.3		10.42	6.16	6.76	7.65			4.93	7.93	5.09	5.33		3.86	4.45	5		6.02	8.01	4		4.39	5.33	7.75	6.01			8.05	8.05	7.01		12.09	8.41	8.97		8.07	7.93
	12	5.64	8.03	5.11	4.18		7.05	5.52	7.41		8.02	7.9	8.15		7.51	5.88	6.48	7.03			6.72	8.08	5.23	4.15		7.41	5.74	5.45		7.08	8.16	4.33		6.37	5.02	6.78	6.1			0	0	0		0	0	0		0	0
	13	6.44	8.1	5.23	4.23		5.81	5.74	7.03		5.57	8.12	7.75		10.72	5.99	7.78	6.99			6.06	8.18	4.81	4.29		7.45	5.77	5.76		5.62	8	4.52		6.34	5.2	8.12	6.7			8.07	7.9	4.18		12.01	8.9	9.18		8.1	7.58
	14	3.93	8.03	4.72	4.31		7.26	5.12	6.41		5.5	8.2	7.14		9.31	6.09	7.8	7.26			5.4	8.06	4.94	4.29		9.65	4.79	5.69		6.37	8.16	4.81		5.35	5.31	8.06	5.4			0	0	0		0	0	0		0	0
	15	6.74	7.92	5.63	4.29		8.86	5.06	7.24		6.9	7.97	7.39		9.67	6.12	7.62	6.85			5.87	7.98	5.34	4.23		7.03	5.68	4.85		6.38	8.16	5.41		6.3	5.4	7.31	5.96			10.08	8.19	4.25		12.12	9.13	9.04		8.13	8.17
	16	6.09	8.18	5.82	4.34		6.94	4.27	6.83		5.44	8.14	6.75		7.78	6.07	7.04	6.13			6.15	8.04	4.85	4.43		7.33	4.78	5.63		6.21	8.2	5.17		7.27	6.08	7.99	5.8			0	0	0		0	0	0		0	0
	17	5.38	7.96	7.16	4.28		8.01	5.45	7.28		6.68	8.17	6.81		7.65	5.99	6.36	6.08			6.63	7.98	4.69	4.35		7.49	5.52	5.78		5.59	8.02	5		6.73	4.94	8.01	5.82			10.04	8	4.4		11.99	8.14	8.03		8.17	7.03
	18	5.77	7.83	5.69	4.32		7.34	5.32	8.17		5.77	8	6.91		8.74	6.16	6.45	7.19			5.9	7.92	5.23	4.26		6.61	5.14	4.99		6.2	7.99	5.12		6.05	6.06	7.93	5.31			0	0	0		0	0	0		0	0
	19	4.93	7.93	5.31	4.17		6.44	4.77	7.74		5.39	8.09	6.83		9.54	6.17	5.03	6.22			5.63	8.1	4.78	4.48		6.11	5.13	5.18		5.81	7.95	4.22		4.87	5.72	6.27	5.81			9.93	8.05	4.4		12	7.96	8.17		8.11	7.05
	20	5.71	8.11	4.51	4.24		6.41	4.56	6.07		6.7	8.01	5.43		7.95	6.15	5.97	5.39			4.6	7.92	4.72	4.22		6.64	4.41	4.29		6.98	7.91	4.43		5.73	6.01	6.75	5.19			0	0	0		0	0	0		0	0
	21	6.67	8.04	5.72	4.1		8.09	5.29	7.36		5.57	7.97	6.52		8.41	6.12	5.15	6.15			5.22	8.02	4.79	4.21		6.91	4.67	4.4		6.36	7.01	5.9		5.75	5.02	6.78	4.68			10.04	8.1	4.26		11.34	7.9	8.18		8.1	7.16
	22	5.35	8.1	5.47	4.2		8.16	4.52	7.37		7.02	7.95	6.9		8.45	6.18	6.68	4.61			4.62	8.07	5.32	4.2		5.53	5.44	4.71		5.11	8.17	5.38		6.06	4.95	7.43	5.28			0	0	0		0	0	0		0	0
	23	5.05	8.1	5.45	4.28		6.63	4.97	6.9		5.12	8.14	6.49		8.08	6.05	6.3	4.7			4.57	8	4.75	4.18		6.43	5.35	4.92		5.13	8.03	3.92		6.29	5.61	6.53	4.76			9.92	8.05	4.18		10.09	8.04	8.11		8.09	6.95
	24	5.59	7.97	5.7	4.3		7.75	4.84	6.46		5.57	8.17	6.34		7.03	6.07	7.1	5.5			4.38	8.11	5.21	4.25		6.37	4.8	4.6		5.93	8.16	3.43		5.33	5.28	8.03	4.77			0	0	0		0	0	0		0	0
	25	4.17	8.06	4.88	4.27		7.11	4.15	6.33		5.87	8.06	5.14		8.53	6.08	6.1	4.87			4.79	7.99	4.75	4.35		6.11	4.62	5.01		5.73	7.96	3.56		5.89	5.43	8.16	4.66			9.85	8.09	4.3		11.93	8.14	8.12		8.13	7.09
	26	6.16	8	5.45	4.36		6.73	4.73	6.35		5.22	7.99	5.84		9.12	5.95	6.26	5.09			5.44	8.03	5.02	4.44		5.89	4.73	4.68		5.07	7.98	5.03		5.96	5.21	8.13	4.44			0	0	0		0	0	0		0	0
	27	5.2	8.04	4.16	4.35		6.97	4.73	7.02		5.72	8.03	4.83		8.52	6.09	5.9	6.13			6.11	7.87	3.71	4.35		5.93	5.09	5.64		5.44	7.96	5.02		4.85	4.74	7.74	4.63			10.17	7.94	4.38		11.98	7.95	7.91		7.94	6.97
	28	5.18	7.94	5.33	4.48		6.85	4.5	5.82		5.09	8.18	5.08		8.24	6.1	6.57	6.33			4.69	8.12	4.94	4.41		6.05	4.46	5.18		4.72	8.16	4.99		4.45	5.2	6.53	4.31			0	0	0		0	0	0		0	0
Kal		Control diet																			Meal feeding																			Fasting
		生理盐水									Cisp										生理盐水									Cisp										生理盐水								Cisp
		♀					♂				♀				♂						♀					♂				♀				♂						♀				♂				♀
		①	②	③	④		①	②	③		①	②	③		①	②	③	④			①	②	③	④		①	②	③		①	②	③		①	②	③	④			①	②	③		①	②	③		①	②
	1	15.232	27.54	20.162	20.162		19.788	17.578	24.412		13.6	27.472	20.332		41.106	24.786	38.148	24.378			16.252	12.308	20.57	20.672		22.78	16.252	18.836		20.4	27.472	13.328	0	32.096	19.516	28.9	24.242			27.438	27.404	20.06	0	41.106	20.74	22.542	0	27.438	17.68
	2	23.97	26.894	20.468	20.978		27.54	23.936	23.732		27.336	27.744	20.672		40.154	18.53	30.124	24.14			17.17	17	20.774	20.502		22.338	18.292	18.972		27.948	27.744	20.434	0	22.066	20.094	31.62	18.53			0	0	0	0	0	0	0	0	0	0
	3	21.182	27.676	19.89	19.788		27.132	17.748	23.256		24.99	27.812	19.754		40.46	20.774	24.548	24.31			19.176	27.098	20.06	20.366		23.834	18.598	19.788		12.036	27.404	15.946	0	22.44	23.256	33.898	18.734			26.792	26.996	20.06	0	41.14	24.242	24.004	0	27.37	20.468
	4	16.592	27.88	20.4	20.672		28.186	13.974	20.672		24.072	27.268	20.366		27.132	17.204	30.124	24.106			17.68	25.5	19.89	23.324		24.786	15.776	19.822		23.256	27.2	16.252	0	14.96	21.114	24.378	21.76			0	0	0	0	0	0	0	0	0	0
	5	24.922	27.676	18.666	19.176		23.086	18.19	22.678		17.68	26.928	20.978		25.908	19.482	25.296	24.14			16.83	27.268	20.298	23.936		26.622	17.408	22.168		24.038	27.234	20.23	0	17.102	21.114	23.936	23.8			26.86	27.302	24.446	0	41.14	23.596	23.392	0	27.744	20.06
	6	23.222	26.962	20.366	18.53		22.202	22.406	23.936		21.42	27.166	20.298		25.67	17.578	19.686	23.936			15.674	27.064	18.428	23.46		27.268	18.496	21.624		21.454	27.098	15.028	0	19.312	22.78	29.376	20.944			0	0	0	0	0	0	0	0	0	0
	7	18.428	27.846	15.13	18.564		22.406	14.688	23.698		23.018	27.506	20.604		29.24	20.468	21.998	23.63			18.802	27.302	19.414	23.868		22.95	18.054	21.794		21.25	27.88	16.354	0	17	22.168	25.5	18.7			27.132	26.996	23.8	0	40.46	24.004	24.616	0	27.472	20.366
	8	23.528	26.962	20.23	17.408		22.236	17.816	23.562		20.808	27.302	20.944		24.922	20.06	20.366	23.528			20.536	26.996	16.286	19.516		23.664	17.476	20.332		17.306	27.676	15.708	0	16.966	21.658	21.998	21.216			0	0	0	0	0	0	0	0	0	0
	9	17.748	27.438	16.558	18.836		22.576	16.286	22.95		20.91	27.676	20.91		37.264	19.21	21.318	24.344			21.318	27.268	17.612	16.966		26.18	15.776	18.7		22.134	27.506	17.34	0	21.454	19.04	22.814	18.7			26.894	27.744	23.868	0	40.426	23.766	23.63	0	27.132	20.468
	10	19.822	26.928	21.658	14.042		26.146	19.108	21.998		20.264	26.894	23.154		30.6	20.06	24.922	27.71			22.44	27.54	19.754	17.034		27.03	18.632	21.114		23.698	27.03	19.006	0	24.514	15.878	28.662	17.408			0	0	0	0	0	0	0	0	0	0
	11	16.014	27.404	17.816	14.756		19.04	12.818	23.188		15.912	27.234	24.82		35.428	20.944	22.984	26.01			16.762	26.962	17.306	18.122		13.124	15.13	17		20.468	27.234	13.6	0	14.926	18.122	26.35	20.434			27.37	27.37	23.834	0	41.106	28.594	30.498	0	27.438	26.962
	12	19.176	27.302	17.374	14.212		23.97	18.768	25.194		27.268	26.86	27.71		25.534	19.992	22.032	23.902			22.848	27.472	17.782	14.11		25.194	19.516	18.53		24.072	27.744	14.722	0	21.658	17.068	23.052	20.74			0	0	0	0	0	0	0	0	0	0
	13	21.896	27.54	17.782	14.382		19.754	19.516	23.902		18.938	27.608	26.35		36.448	20.366	26.452	23.766			20.604	27.812	16.354	14.586		25.33	19.618	19.584		19.108	27.2	15.368	0	21.556	17.68	27.608	22.78			27.438	26.86	14.212	0	40.834	30.26	31.212	0	27.54	25.772
	14	13.362	27.302	16.048	14.654		24.684	17.408	21.794		18.7	27.88	24.276		31.654	20.706	26.52	24.684			18.36	27.404	16.796	14.586		32.81	16.286	19.346		21.658	27.744	16.354	0	18.19	18.054	27.404	18.36			0	0	0	0	0	0	0	0	0	0
	15	22.916	26.928	19.142	14.586		30.124	17.204	24.616		23.46	27.098	25.126		32.878	20.808	25.908	23.29			19.958	27.132	18.156	14.382		23.902	19.312	16.49		21.692	27.744	18.394	0	21.42	18.36	24.854	20.264			34.272	27.846	14.45	0	41.208	31.042	30.736	0	27.642	27.778
	16	20.706	27.812	19.788	14.756		23.596	14.518	23.222		18.496	27.676	22.95		26.452	20.638	23.936	20.842			20.91	27.336	16.49	15.062		24.922	16.252	19.142		21.114	27.88	17.578	0	24.718	20.672	27.166	19.72			0	0	0	0	0	0	0	0	0	0
	17	18.292	27.064	24.344	14.552		27.234	18.53	24.752		22.712	27.778	23.154		26.01	20.366	21.624	20.672			22.542	27.132	15.946	14.79		25.466	18.768	19.652		19.006	27.268	17	0	22.882	16.796	27.234	19.788			34.136	27.2	14.96	0	40.766	27.676	27.302	0	27.778	23.902
	18	19.618	26.622	19.346	14.688		24.956	18.088	27.778		19.618	27.2	23.494		29.716	20.944	21.93	24.446			20.06	26.928	17.782	14.484		22.474	17.476	16.966		21.08	27.166	17.408	0	20.57	20.604	26.962	18.054			0	0	0	0	0	0	0	0	0	0
	19	16.762	26.962	18.054	14.178		21.896	16.218	26.316		18.326	27.506	23.222		32.436	20.978	17.102	21.148			19.142	27.54	16.252	15.232		20.774	17.442	17.612		19.754	27.03	14.348	0	16.558	19.448	21.318	19.754			33.762	27.37	14.96	0	40.8	27.064	27.778	0	27.574	23.97
	20	19.414	27.574	15.334	14.416		21.794	15.504	20.638		22.78	27.234	18.462		27.03	20.91	20.298	18.326			15.64	26.928	16.048	14.348		22.576	14.994	14.586		23.732	26.894	15.062	0	19.482	20.434	22.95	17.646			0	0	0	0	0	0	0	0	0	0
	21	22.678	27.336	19.448	13.94		27.506	17.986	25.024		18.938	27.098	22.168		28.594	20.808	17.51	20.91			17.748	27.268	16.286	14.314		23.494	15.878	14.96		21.624	23.834	20.06	0	19.55	17.068	23.052	15.912			34.136	27.54	14.484	0	38.556	26.86	27.812	0	27.54	24.344
	22	18.19	27.54	18.598	14.28		27.744	15.368	25.058		23.868	27.03	23.46		28.73	21.012	22.712	15.674			15.708	27.438	18.088	14.28		18.802	18.496	16.014		17.374	27.778	18.292	0	20.604	16.83	25.262	17.952			0	0	0	0	0	0	0	0	0	0
	23	17.17	27.54	18.53	14.552		22.542	16.898	23.46		17.408	27.676	22.066		27.472	20.57	21.42	15.98			15.538	27.2	16.15	14.212		21.862	18.19	16.728		17.442	27.302	13.328	0	21.386	19.074	22.202	16.184			33.728	27.37	14.212	0	34.306	27.336	27.574	0	27.506	23.63
	24	19.006	27.098	19.38	14.62		26.35	16.456	21.964		18.938	27.778	21.556		23.902	20.638	24.14	18.7			14.892	27.574	17.714	14.45		21.658	16.32	15.64		20.162	27.744	11.662	0	18.122	17.952	27.302	16.218			0	0	0	0	0	0	0	0	0	0
	25	14.178	27.404	16.592	14.518		24.174	14.11	21.522		19.958	27.404	17.476		29.002	20.672	20.74	16.558			16.286	27.166	16.15	14.79		20.774	15.708	17.034		19.482	27.064	12.104	0	20.026	18.462	27.744	15.844			33.49	27.506	14.62	0	40.562	27.676	27.608	0	27.642	24.106
	26	20.944	27.2	18.53	14.824		22.882	16.082	21.59		17.748	27.166	19.856		31.008	20.23	21.284	17.306			18.496	27.302	17.068	15.096		20.026	16.082	15.912		17.238	27.132	17.102	0	20.264	17.714	27.642	15.096			0	0	0	0	0	0	0	0	0	0
	27	17.68	27.336	14.144	14.79		23.698	16.082	23.868		19.448	27.302	16.422		28.968	20.706	20.06	20.842			20.774	26.758	12.614	14.79		20.162	17.306	19.176		18.496	27.064	17.068	0	16.49	16.116	26.316	15.742			34.578	26.996	14.892	0	40.732	27.03	26.894	0	26.996	23.698
	28	17.612	26.996	18.122	15.232		23.29	15.3	19.788		17.306	27.812	17.272		28.016	20.74	22.338	21.522			15.946	27.608	16.796	14.994		20.57	15.164	17.612		16.048	27.744	16.966	0	15.13	17.68	22.202	14.654			0	0	0	0	0	0	0	0	0	0
g
	1	39.14	26.86	26.59	31.89		37.97	30.62	31.47		35.47	30.53	25.12		43.9	37.96	36.95	44.29			35.58	26.48	26.42	32.13		40.8	30.41	33.53		34.61	26.58	25.69		38.84	37.14	35.24	40.19			37.29	29.79	27.41		44.1	29.63	30.2		29.6	24.02
	2	36.78	27.92	26.86	31.84		35.86	32.22	32.99		35.21	30.62	25.43		44.01	38.73	40.99	45.17			35.38	25.06	27.77	35.39		40.75	31.78	35.41		34.75	27.67	26.21		38.03	36.4	37.76	41.79			34.7	31.09	29.25		44.39	31.77	32.56		30.62	25.03
	3	36.09	27.85	27.12	32.31		40.78	31.07	31.42		35.96	30.95	25.26		44.13	39.33	41.31	42.77			34.99	25.56	26.5	34.18		40.63	31.1	34		34.86	29.42	26.63		38.1	37.3	37.42	40.24			31.75	28.84	25.44		41.23	27.94	27.94		27.45	22.16
	4	36.57	26.62	28.1	33.02		41.15	32.87	32.86		36.82	25.51	25.48		43.53	39.33	41.13	44.56			36	28.12	28.17	34.38		41.08	31.95	34.94		33.56	28.5	27.06		38.54	37.9	38.01	41.02			34	29.25	28		44.18	30.68	31.24		28.21	24.48
	5	35.17	26.96	29.42	32.66		40.88	32.37	32.39		36.04	28.16	26.02		42.48	39.18	41.49	45.01			36.03	28.78	27.94	33.98		40.56	31.93	36.38		33.67	28.9	27.23		36.98	37.94	37.87	41.91			29.69	26.7	23.56		39.69	26.51	27.5		23.68	20.88
	6	36.3	27.29	29.23	32.94		40.97	33.45	32.55		35.42	28.22	25.75		42.66	39	41.01	45.43			35.17	31.17	29.21	35.43		41.42	32.28	35.89		33.88	28.5	27.25		36.32	37.35	37.36	41.73			32.35	29.59	28.52		42.82	29.02	30.08		29.73	22.78
	7	36.35	24.95	28.99	32.91		40.23	33.89	31.62		35.74	25.13	25.85		42.43	39.37	41.3	45.69			35.19	31.98	28.83	35.5		41.11	32.8	35.91		34.02	28.46	27.29		36.65	37.66	39.01	41.5			28.3	26.73	24.27		38.92	26.18	26.66		31.83	18.88
	8	36.28	26.68	29.37	33.26		39.52	33.05	31		36.21	26.72	25.65		43.15	39.95	41.67	45.65			36.47	31.48	28.33	36.27		40.65	32.65	36.35		33.5	27.38	27.68		35.76	38.35	38.07	40.79			30.96	29.78	27.7		41.78	29.21	30.63		32.5	22.59
	9	36.64	27.46	29.45	32.96		39.61	34.04	31.62		35.69	28.37	25.57		41.91	40.26	41.44	45.82			36.49	30.35	28.43	34.25		40.63	32.09	36.56		33.14	28.93	27.27		35.88	37.45	38.41	41.41			27.11	27.5	23.25		38.3	24.89	25.78		28.95	17.56
	10	36.16	25.07	29.54	32.98		39.31	33.8	31.56		36.31	26.04	26		42.06	40.13	41.77	46			37.15	30.84	28.76	34.44		40.8	32.25	36.52		34	28.45	28.42		36.88	37.24	38.42	41.3			29.24	28.92	27.42		41.55	28	29.5		30.39	23.2
	11	35.73	23.17	30.56	32.26		40.49	34.67	31.71		35.51	25	25.7		42.4	40.69	41.36	46.94			37.1	29.94	29.75	34.99		40.94	33.35	36.96		34.11	26.66	28.86		38.14	36.96	38.46	40.97			26.51	25.98	22.63		38.7	25.11	26.07		24.87	17.46
	12	32.84	25.54	29.76	32.64		36.47	33.4	32.84		32.45	26.37	26.71		38.78	40.97	41.27	47.4			32.83	30.36	29.38	35.07		35.22	32.99	37.27		30.93	27.54	27.16		33.26	37.38	38.6	41.9			28.02	27.87	27.86		39.12	30.52	30.71		28.97	23.25
	13	35.93	26.96	30.41	32.19		38.67	34.54	33.25		36.08	27.31	27.75		41.72	40.84	41.13	47.5			37.63	30.17	28.4	34.32		39.62	33.64	36.6		33.26	27	28.73		37.39	37.64	38.41	41.04			24.86	26.43	23.07		36.68	24.39	25.93		24.45	17.32
	14	35.09	24.67	29.8	31.74		37.26	34.48	32.15		35.27	27.21	27.34		41.31	41.07	41.84	48.07			37.34	29.61	29	33.39		40.55	33.8	36.96		33.31	28.2	28.15		37.15	37.07	39.7	41.66			26.5	27.74	23.49		41.35	29.87	31.6		26.92	23.99
	15	34.58	26.01	29.71	31.76		36.96	34.41	32.63		35.19	27.84	28.54		41.26	40.85	41.24	48.32			37	30.17	28.64	33.83		40.61	33.07	36.76		33.45	28.38	28.73		36.84	37.23	39.21	41.04			23.49	24.72	19.47		36.59	24.62	26.75		21.36	19.29
	16	35.55	27.05	30.14	31.94		38.68	35	32.86		35.81	29.01	27.4		41.49	41.51	41.32	48.16			37.41	30.37	29.04	33.71		40.56	33.8	37		34.07	28.61	29.3		37.72	37.56	39.62	41.72			26.93	27.49	22.83		40.99	30.05	30.13		28.15	24.78
	17	35.37	23.86	29.81	31.9		38.95	35.13	33.03		35.15	27.38	27.16		41.66	41.06	41.35	48.08			37.42	29.58	29.3	34.69		40.44	33.45	37.31		33.49	28	29.39		39.18	37.64	39.3	41.52			22.95	25.26	19.14		36.44	24.57	26.44		23.58	18.5
	18	36.1	25.72	30.35	32.44		39.27	36.02	33.11		36.51	28.51	28.23		41.56	40.45	41.35	48.46			37.79	31.05	29.36	34.7		40.96	33.68	37.38		34.03	29.27	28.73		39.03	37.51	39.65	41.86			30.1	27.39	22.64		40.89	28.67	29.51		28.1	23.05
	19	34.54	23.87	30.97	32.39		38.56	35.52	33.68		36.04	27.32	28.52		41.57	40.68	41.09	48.78			37.5	29.35	29.33	34.06		40.67	33.75	36.31		34.01	27.89	30.19		38.52	38.13	39.75	41.46			25.05	24.51	19.44		37.14	24.06	26.1		22.19	17.37
	20	34.12	26.09	31.14	32.31		38.61	35.82	34		35.5	29.49	28.85		42.22	41.67	40.79	48.62			37.77	30.18	29.13	33.69		40.13	33.68	37.08		33.32	28.92	29.13		37.85	38.48	39.56	41.75			31.43	27.21	22.39		41.62	28.14	29.4		27.41	22.69
	21	34.42	26.13	31.6	32.63		37.85	35.93	34.87		35.79	28.25	29.1		41.55	41.08	41.27	48.39			36.03	30.13	29.75	33.3		40.85	34.08	37.55		34.76	28.32	29.85		37.75	38.59	39.89	42.12			26.06	24.42	18.2		37.41	24.5	26.3		22.74	17.36
	22	36.42	27.82	31.77	32.03		39.06	36.7	34.83		35.57	28.91	29.64		42.84	41.49	41.26	48.02			36.73	30.25	29.85	32.75		40.26	35.35	37.25		34.38	27.87	31.65		37.83	38.26	40.14	41.55			32.26	27.6	21.03		41.97	28.9	30.43		26.37	23.83
	23	34.9	25.79	31.49	32.2		39.21	36.05	35.33		36.43	28.23	30.73		42.13	41.03	41.19	47.12			35.57	30.25	27.93	32.42		39.86	33.96	37.51		34.02	28.12	31.1		38.09	38.8	40.61	41.36			27.01	25.43	17.94		37.74	23.83	25.92		22.83	17.5
	24	35.05	26.98	31.75	32.23		38.87	36.66	35.4		35.96	29	30.33		42.46	40.89	41.75	46.88			35.34	31.09	29.35	32.68		39.99	34.91	37.12		34.42	27.85	28.33		39.67	39.12	40.32	41.88			32.5	28.06	21.45		41.74	29.23	30.07		27.05	23.37
	25	35	26.43	32.26	32.18		38.81	37.29	35.81		36.5	27.86	31.4		41.56	40.35	40.82	47.05			35.38	29.68	29.7	32.8		40.41	34.77	36.96		34.98	28.35	29.88		39.13	38.51	39.89	40.96			28.55	25.09	17.34		38.54	24.72	26.47		22	17.65
	26	34.41	27.9	32.07	32.56		37.73	36.83	36.41		35.86	29.08	30.41		42.17	39.79	41	47.06			35.38	30.66	29.49	33.07		40.14	34.3	37.32		34.02	28.7	29.26		39.25	38.52	40.36	41			30.74	27.44	21.58		42.14	29.3	29.11		26.17	23.1
	27	35.81	28.45	31.75	32.61		38.47	37.41	36.27		35.99	29.89	30.57		42.61	40.36	41.07	46.87			36.55	30.9	30.04	31.91		39.93	34.57	37.29		33.91	28.6	30.46		39.73	38.96	40.48	41.52			27.82	24.8	17.94		38.11	25.14	25.94		23.32	17.48
	28	35.49	26.09	31.52	32.83		38.07	37.64	35.92		35.76	29.89	28.56		42.03	41.03	41.67	47.49			37.6	30.98	28.1	32.51		39.86	34.6	38.48		34.03	29.11	31.13		38.92	38.8	40.16	41.38			31.23	27.1	21.83		43.21	29.7	28.31		24.58	22.48
KJ/g
	1	0.389167	1.02532	0.758255	0.632236		0.521148	0.574069	0.775723		0.383423	0.899836	0.809395		0.936355	0.65295	1.03242	0.550418			0.456773	0.464804	0.778577	0.643386		0.558333	0.534429	0.561766		0.589425	1.03356	0.518801		0.826365	0.525471	0.820091	0.603185			0.7358	0.919906	0.73185		0.932109	0.699966	0.746424		0.926959	0.736053
	2	0.651713	0.963252	0.762025	0.658857		0.767987	0.742893	0.71937		0.77637	0.906074	0.812898		0.912384	0.47844	0.734911	0.534426			0.485302	0.678372	0.748073	0.579316		0.548172	0.575582	0.535781		0.804259	1.00267	0.779626		0.580226	0.552033	0.837394	0.443408			0	0	0		0	0	0		0	0
	3	0.586922	0.993752	0.733407	0.612442		0.665326	0.571226	0.740165		0.694939	0.898611	0.782027		0.916837	0.528197	0.594239	0.568389			0.548042	1.06017	0.756981	0.595846		0.586611	0.598006	0.582		0.345267	0.931475	0.598798		0.588976	0.623485	0.905879	0.465557			0.843843	0.936061	0.788522		0.997817	0.867645	0.859127		0.997086	0.923646
	4	0.453705	1.04733	0.725979	0.626045		0.684957	0.425129	0.629093		0.653775	1.06891	0.799294		0.623294	0.437427	0.732409	0.540978			0.491111	0.906828	0.70607	0.678418		0.603359	0.493772	0.567315		0.692968	0.954386	0.600591		0.388168	0.557098	0.641358	0.530473			0	0	0		0	0	0		0	0
	5	0.708615	1.02656	0.634466	0.58714		0.564726	0.56194	0.700154		0.490566	0.95625	0.806226		0.609887	0.497243	0.609689	0.536325			0.467111	0.947464	0.726485	0.704414		0.656361	0.545193	0.609346		0.713929	0.942353	0.742931		0.462466	0.55651	0.632057	0.567884			0.904682	1.02255	1.03761		1.03653	0.890079	0.850618		1.17162	0.960728
	6	0.639725	0.987981	0.69675	0.562538		0.541909	0.669836	0.735361		0.604743	0.962651	0.788272		0.601735	0.450718	0.480029	0.526877			0.445664	0.868271	0.63088	0.662151		0.658329	0.572986	0.602508		0.633235	0.950807	0.551486		0.531718	0.609906	0.786296	0.501893			0	0	0		0	0	0		0	0
	7	0.50696	1.11607	0.521904	0.564084		0.556948	0.433402	0.749462		0.64404	1.09455	0.79706		0.689135	0.519888	0.532639	0.517181			0.5343	0.853721	0.673396	0.672338		0.558258	0.550427	0.606906		0.624633	0.979621	0.599267		0.463847	0.588635	0.653679	0.450602			0.958728	1.00995	0.980635		1.03957	0.916883	0.923331		0.863085	1.07871
	8	0.648512	1.01057	0.688798	0.523391		0.562652	0.539062	0.760065		0.574648	1.02178	0.81653		0.577567	0.502128	0.488745	0.5154			0.563093	0.85756	0.574868	0.538076		0.58214	0.535253	0.55934		0.516597	1.01081	0.567486		0.474441	0.564746	0.57783	0.520127			0	0	0		0	0	0		0	0
	9	0.484389	0.999199	0.562241	0.571481		0.569957	0.478437	0.725806		0.585878	0.975538	0.817755		0.889143	0.477149	0.514431	0.531296			0.584215	0.898451	0.619486	0.495358		0.644351	0.491617	0.511488		0.667894	0.950778	0.635864		0.597938	0.508411	0.59396	0.451582			0.992032	1.00887	1.02658		1.05551	0.954841	0.916602		0.937202	1.1656
	10	0.548175	1.07411	0.733175	0.425773		0.665123	0.565325	0.697022		0.558083	1.0328	0.890538		0.727532	0.499875	0.596648	0.602391			0.604038	0.892996	0.686857	0.494599		0.6625	0.577736	0.578149		0.697	0.950088	0.668754		0.664696	0.426369	0.746018	0.421501			0	0	0		0	0	0		0	0
	11	0.448195	1.18274	0.582984	0.457409		0.47024	0.369714	0.731252		0.448099	1.08936	0.965759		0.835566	0.514721	0.555706	0.554112			0.451806	0.900534	0.581714	0.517919		0.320567	0.453673	0.459957		0.600059	1.02153	0.47124		0.391348	0.490314	0.685127	0.498755			1.03244	1.0535	1.0532		1.06217	1.13875	1.16985		1.10326	1.54422
	12	0.583922	1.06899	0.583804	0.435417		0.657253	0.561916	0.767174		0.840308	1.01858	1.03744		0.658432	0.487967	0.53385	0.504262			0.695949	0.904875	0.605242	0.402338		0.715332	0.591573	0.497183		0.778274	1.00741	0.542047		0.651173	0.456608	0.597202	0.494988			0	0	0		0	0	0		0	0
	13	0.609407	1.02151	0.584742	0.446785		0.510835	0.565026	0.718857		0.524889	1.01091	0.94955		0.873634	0.498678	0.643132	0.500337			0.547542	0.921843	0.575845	0.425		0.639324	0.583175	0.535082		0.574504	1.00741	0.534911		0.576518	0.469713	0.718771	0.555068			1.1037	1.01627	0.616038		1.11325	1.24067	1.2037		1.12638	1.48799
	14	0.380792	1.10669	0.538523	0.461689		0.66248	0.504872	0.677885		0.530196	1.02462	0.88793		0.766255	0.504164	0.633843	0.513501			0.491698	0.925498	0.579172	0.436837		0.809125	0.481834	0.523431		0.650195	0.98383	0.580959		0.489637	0.487025	0.690277	0.440711			0	0	0		0	0	0		0	0
	15	0.662695	1.03529	0.644295	0.459257		0.815043	0.499971	0.754398		0.666667	0.973348	0.880378		0.796849	0.509376	0.628225	0.481995			0.539405	0.899304	0.633939	0.425126		0.588574	0.583973	0.448585		0.64849	0.97759	0.640237		0.581433	0.493151	0.633869	0.493762			1.459	1.12646	0.742167		1.12621	1.26084	1.14901		1.2941	1.44002
	16	0.582447	1.02817	0.656536	0.461991		0.610031	0.4148	0.706695		0.516504	0.954016	0.837591		0.637551	0.497181	0.579284	0.432766			0.558941	0.900099	0.567837	0.446811		0.614448	0.480828	0.517351		0.619724	0.974484	0.599932		0.655302	0.550373	0.685664	0.472675			0	0	0		0	0	0		0	0
	17	0.517161	1.13428	0.816639	0.456176		0.699204	0.527469	0.749379		0.646145	1.01454	0.852504		0.62434	0.496006	0.52295	0.42995			0.602405	0.917241	0.544232	0.426348		0.629723	0.561076	0.526722		0.567513	0.973857	0.578428		0.584022	0.446227	0.692977	0.47659			1.48741	1.0768	0.781609		1.11872	1.12641	1.0326		1.17803	1.292
	18	0.543435	1.03507	0.63743	0.452774		0.635498	0.502165	0.838961		0.537332	0.954051	0.832235		0.715014	0.517775	0.530351	0.504457			0.530828	0.867246	0.605654	0.417406		0.548682	0.518884	0.453879		0.619453	0.928118	0.605917		0.52703	0.549294	0.68	0.431295			0	0	0		0	0	0		0	0
	19	0.485292	1.12953	0.582951	0.437728		0.567842	0.456588	0.781354		0.508491	1.00681	0.814236		0.780274	0.515683	0.416208	0.433538			0.510453	0.93833	0.554108	0.447211		0.510794	0.5168	0.485045		0.580829	0.969165	0.475257		0.429855	0.510045	0.536302	0.476459			1.34778	1.11669	0.769547		1.09855	1.12485	1.06429		1.24263	1.37997
	20	0.568992	1.05688	0.492421	0.446178		0.564465	0.432831	0.607		0.64169	0.923499	0.639931		0.640218	0.5018	0.497622	0.376923			0.414085	0.892247	0.55091	0.425883		0.562572	0.44519	0.393366		0.712245	0.929945	0.517061		0.514716	0.531029	0.580131	0.422659			0	0	0		0	0	0		0	0
	21	0.658861	1.04615	0.615443	0.427214		0.726711	0.500584	0.717637		0.529142	0.959221	0.761787		0.688183	0.506524	0.424279	0.432114			0.49259	0.905012	0.547429	0.42985		0.575129	0.465904	0.398402		0.622094	0.841596	0.672027		0.517881	0.442291	0.577889	0.377778			1.3099	1.12776	0.795824		1.03063	1.09633	1.05749		1.21108	1.4023
	22	0.499451	0.989935	0.585395	0.445832		0.710292	0.418747	0.719437		0.671015	0.934971	0.791498		0.670635	0.506435	0.55046	0.326406			0.427661	0.907041	0.605963	0.436031		0.467014	0.523225	0.429906		0.505352	0.996699	0.577946		0.544647	0.439885	0.629347	0.432058			0	0	0		0	0	0		0	0
	23	0.491977	1.06786	0.588441	0.451925		0.574904	0.468738	0.664025		0.477848	0.980375	0.718061		0.652077	0.50134	0.520029	0.339134			0.436829	0.899174	0.578231	0.438371		0.54847	0.53563	0.445961		0.512698	0.97091	0.428553		0.56146	0.491598	0.546713	0.391296			1.24872	1.07629	0.792196		0.909009	1.14713	1.06381		1.20482	1.35029
	24	0.542254	1.00437	0.610394	0.453615		0.677901	0.448882	0.620452		0.526641	0.957862	0.710715		0.56293	0.50472	0.578204	0.398891			0.421392	0.886909	0.603543	0.442166		0.541585	0.467488	0.421336		0.585764	0.996194	0.411648		0.456819	0.458896	0.677133	0.387249			0	0	0		0	0	0		0	0
	25	0.405086	1.03685	0.514321	0.45115		0.622881	0.378386	0.601005		0.546795	0.983632	0.556561		0.697834	0.512317	0.508084	0.351923			0.460317	0.915296	0.543771	0.450915		0.514081	0.451769	0.460877		0.556947	0.954638	0.405087		0.511781	0.479408	0.695513	0.386816			1.17303	1.09629	0.843137		1.05246	1.11958	1.04299		1.25645	1.36578
	26	0.60866	0.97491	0.577799	0.455283		0.606467	0.436655	0.592969		0.494925	0.934182	0.652943		0.735309	0.508419	0.519122	0.367743			0.522781	0.890476	0.578772	0.456486		0.498904	0.468863	0.426367		0.506702	0.945366	0.584484		0.51628	0.459865	0.684886	0.368195			0	0	0		0	0	0		0	0
	27	0.493717	0.960844	0.44548	0.453542		0.616012	0.429885	0.658065		0.540372	0.913416	0.537193		0.67984	0.513033	0.488434	0.444677			0.568372	0.865955	0.419907	0.463491		0.504934	0.500607	0.51424		0.545444	0.946294	0.560341		0.415052	0.413655	0.650099	0.379143			1.24292	1.08855	0.8301		1.0688	1.07518	1.03678		1.15763	1.35572
	28	0.496252	1.03473	0.574937	0.463966		0.611768	0.406482	0.550891		0.483949	0.930478	0.604762		0.666571	0.505484	0.536069	0.45319			0.424096	0.891156	0.597722	0.461212		0.516056	0.438266	0.457692		0.471584	0.953075	0.545005		0.388746	0.45567	0.552839	0.354132			0	0	0		0	0	0		0	0
[truncated: 24 more columns]

## Sheet: KJ2
	1	4.48	8.1	5.93	5.93		5.82	5.17	7.18		4	8.08	5.98		12.09	7.29	11.22	7.17			4.78	3.62	6.05	6.08		6.7	4.78	5.54		6	8.08	3.92		9.44	5.74	8.5	7.13			8.07	8.06	5.9		12.09	6.1	6.63		8.07	5.2
	2	7.05	7.91	6.02	6.17		8.1	7.04	6.98		8.04	8.16	6.08		11.81	5.45	8.86	7.1			5.05	5	6.11	6.03		6.57	5.38	5.58		8.22	8.16	6.01		6.49	5.91	9.3	5.45
	3	6.23	8.14	5.85	5.82		7.98	5.22	6.84		7.35	8.18	5.81		11.9	6.11	7.22	7.15			5.64	7.97	5.9	5.99		7.01	5.47	5.82		3.54	8.06	4.69		6.6	6.84	9.97	5.51			7.88	7.94	5.9		12.1	7.13	7.06		8.05	6.02
	4	4.88	8.2	6	6.08		8.29	4.11	6.08		7.08	8.02	5.99		7.98	5.06	8.86	7.09			5.2	7.5	5.85	6.86		7.29	4.64	5.83		6.84	8	4.78		4.4	6.21	7.17	6.4
	5	7.33	8.14	5.49	5.64		6.79	5.35	6.67		5.2	7.92	6.17		7.62	5.73	7.44	7.1			4.95	8.02	5.97	7.04		7.83	5.12	6.52		7.07	8.01	5.95		5.03	6.21	7.04	7			7.9	8.03	7.19		12.1	6.94	6.88		8.16	5.9
	6	6.83	7.93	5.99	5.45		6.53	6.59	7.04		6.3	7.99	5.97		7.55	5.17	5.79	7.04			4.61	7.96	5.42	6.9		8.02	5.44	6.36		6.31	7.97	4.42		5.68	6.7	8.64	6.16											8.09
	7	5.42	8.19	4.45	5.46		6.59	4.32	6.97		6.77	8.09	6.06		8.6	6.02	6.47	6.95			5.53	8.03	5.71	7.02		6.75	5.31	6.41		6.25	8.2	4.81		5	6.52	7.5	5.5			7.98	7.94	7		11.9	7.06	7.24		8.08	5.99
	8	6.92	7.93	5.95	5.12		6.54	5.24	6.93		6.12	8.03	6.16		7.33	5.9	5.99	6.92			6.04	7.94	4.79	5.74		6.96	5.14	5.98		5.09	8.14	4.62		4.99	6.37	6.47	6.24
	9	5.22	8.07	4.87	5.54		6.64	4.79	6.75		6.15	8.14	6.15		10.96	5.65	6.27	7.16			6.27	8.02	5.18	4.99		7.7	4.64	5.5		6.51	8.09	5.1		6.31	5.6	6.71	5.5			7.91	8.16	7.02		11.89	6.99	6.95		7.98	6.02
	10	5.83	7.92	6.37	4.13		7.69	5.62	6.47		5.96	7.91	6.81		9	5.9	7.33	8.15			6.6	8.1	5.81	5.01		7.95	5.48	6.21		6.97	7.95	5.59		7.21	4.67	8.43	5.12
	11	4.71	8.06	5.24	4.34		5.6	3.77	6.82		4.68	8.01	7.3		10.42	6.16	6.76	7.65			4.93	7.93	5.09	5.33		3.86	4.45	5		6.02	8.01	4		4.39	5.33	7.75	6.01			8.05	8.05	7.01		12.09	8.41	8.97		8.07	7.93
	12	5.64	8.03	5.11	4.18		7.05	5.52	7.41		8.02	7.9	8.15		7.51	5.88	6.48	7.03			6.72	8.08	5.23	4.15		7.41	5.74	5.45		7.08	8.16	4.33		6.37	5.02	6.78	6.1
	13	6.44	8.1	5.23	4.23		5.81	5.74	7.03		5.57	8.12	7.75		10.72	5.99	7.78	6.99			6.06	8.18	4.81	4.29		7.45	5.77	5.76		5.62	8	4.52		6.34	5.2	8.12	6.7			8.07	7.9	4.18		12.01	8.9	9.18		8.1	7.58
	14	3.93	8.03	4.72	4.31		7.26	5.12	6.41		5.5	8.2	7.14		9.31	6.09	7.8	7.26			5.4	8.06	4.94	4.29		9.65	4.79	5.69		6.37	8.16	4.81		5.35	5.31	8.06	5.4
	15	6.74	7.92	5.63	4.29		8.86	5.06	7.24		6.9	7.97	7.39		9.67	6.12	7.62	6.85			5.87	7.98	5.34	4.23		7.03	5.68	4.85		6.38	8.16	5.41		6.3	5.4	7.31	5.96			10.08	8.19	4.25		12.12	9.13	9.04		8.13	8.17
	16	6.09	8.18	5.82	4.34		6.94	4.27	6.83		5.44	8.14	6.75		7.78	6.07	7.04	6.13			6.15	8.04	4.85	4.43		7.33	4.78	5.63		6.21	8.2	5.17		7.27	6.08	7.99	5.8
	17	5.38	7.96	7.16	4.28		8.01	5.45	7.28		6.68	8.17	6.81		7.65	5.99	6.36	6.08			6.63	7.98	4.69	4.35		7.49	5.52	5.78		5.59	8.02	5		6.73	4.94	8.01	5.82			10.04	8	4.4		11.99	8.14	8.03		8.17	7.03
	18	5.77	7.83	5.69	4.32		7.34	5.32	8.17		5.77	8	6.91		8.74	6.16	6.45	7.19			5.9	7.92	5.23	4.26		6.61	5.14	4.99		6.2	7.99	5.12		6.05	6.06	7.93	5.31
	19	4.93	7.93	5.31	4.17		6.44	4.77	7.74		5.39	8.09	6.83		9.54	6.17	5.03	6.22			5.63	8.1	4.78	4.48		6.11	5.13	5.18		5.81	7.95	4.22		4.87	5.72	6.27	5.81			9.93	8.05	4.4		12	7.96	8.17		8.11	7.05
	20	5.71	8.11	4.51	4.24		6.41	4.56	6.07		6.7	8.01	5.43		7.95	6.15	5.97	5.39			4.6	7.92	4.72	4.22		6.64	4.41	4.29		6.98	7.91	4.43		5.73	6.01	6.75	5.19
	21	6.67	8.04	5.72	4.1		8.09	5.29	7.36		5.57	7.97	6.52		8.41	6.12	5.15	6.15			5.22	8.02	4.79	4.21		6.91	4.67	4.4		6.36	7.01	5.9		5.75	5.02	6.78	4.68			10.04	8.1	4.26		11.34	7.9	8.18		8.1	7.16
	22	5.35	8.1	5.47	4.2		8.16	4.52	7.37		7.02	7.95	6.9		8.45	6.18	6.68	4.61			4.62	8.07	5.32	4.2		5.53	5.44	4.71		5.11	8.17	5.38		6.06	4.95	7.43	5.28
	23	5.05	8.1	5.45	4.28		6.63	4.97	6.9		5.12	8.14	6.49		8.08	6.05	6.3	4.7			4.57	8	4.75	4.18		6.43	5.35	4.92		5.13	8.03	3.92		6.29	5.61	6.53	4.76			9.92	8.05	4.18		10.09	8.04	8.11		8.09	6.95
	24	5.59	7.97	5.7	4.3		7.75	4.84	6.46		5.57	8.17	6.34		7.03	6.07	7.1	5.5			4.38	8.11	5.21	4.25		6.37	4.8	4.6		5.93	8.16	3.43		5.33	5.28	8.03	4.77
	25	4.17	8.06	4.88	4.27		7.11	4.15	6.33		5.87	8.06	5.14		8.53	6.08	6.1	4.87			4.79	7.99	4.75	4.35		6.11	4.62	5.01		5.73	7.96	3.56		5.89	5.43	8.16	4.66			9.85	8.09	4.3		11.93	8.14	8.12		8.13	7.09
	26	6.16	8	5.45	4.36		6.73	4.73	6.35		5.22	7.99	5.84		9.12	5.95	6.26	5.09			5.44	8.03	5.02	4.44		5.89	4.73	4.68		5.07	7.98	5.03		5.96	5.21	8.13	4.44
	27	5.2	8.04	4.16	4.35		6.97	4.73	7.02		5.72	8.03	4.83		8.52	6.09	5.9	6.13			6.11	7.87	3.71	4.35		5.93	5.09	5.64		5.44	7.96	5.02		4.85	4.74	7.74	4.63			10.17	7.94	4.38		11.98	7.95	7.91		7.94	6.97
	28	5.18	7.94	5.33	4.48		6.85	4.5	5.82		5.09	8.18	5.08		8.24	6.1	6.57	6.33			4.69	8.12	4.94	4.41		6.05	4.46	5.18		4.72	8.16	4.99		4.45	5.2	6.53	4.31
KJ		Control diet																			Meal feeding																			Fasting
		生理盐水									Cisp										生理盐水									Cisp										生理盐水								Cisp
		♀					♂				♀				♂						♀					♂				♀				♂						♀				♂				♀
		①	②	③	④		①	②	③		①	②	③		①	②	③	④			①	②	③	④		①	②	③		①	②	③		①	②	③	④			①	②	③		①	②	③		①	②
	1	63.7504	115.263	84.3839	84.3839	0	82.8186	73.5691	102.171	0	56.92	114.978	85.0954	0	172.041	103.737	159.661	102.029	0	0	68.0194	51.5126	86.0915	86.5184	0	95.341	68.0194	78.8342	0	85.38	114.978	55.7816	0	134.331	81.6802	120.955	101.46	0	0	114.836	114.694	83.957	0	172.041	86.803	94.3449	0	114.836	73.996
	2	100.322	112.559	85.6646	87.7991		115.263	100.179	99.3254	0	114.409	116.117	86.5184	0	168.056	77.5535	126.078	101.033	0	0	71.8615	71.15	86.9453	85.8069	0	93.4911	76.5574	79.4034	0	116.971	116.117	85.5223	0	92.3527	84.0993	132.339	77.5535	0	0	0	0	0	0	0	0	0	0	0	0
	3	88.6529	115.832	83.2455	82.8186		113.555	74.2806	97.3332	0	104.59	116.401	82.6763	0	169.337	86.9453	102.741	101.745	0	0	80.2572	113.413	83.957	85.2377	0	99.7523	77.8381	82.8186	0	50.3742	114.694	66.7387	0	93.918	97.3332	141.873	78.4073	0	0	112.132	112.986	83.957	0	172.183	101.46	100.464	0	114.552	85.6646
	4	69.4424	116.686	85.38	86.5184		117.967	58.4853	86.5184	0	100.748	114.125	85.2377	0	113.555	72.0038	126.078	100.891	0	0	73.996	106.725	83.2455	97.6178	0	103.737	66.0272	82.9609	0	97.3332	113.84	68.0194	0	62.612	88.3683	102.029	91.072	0	0	0	0	0	0	0	0	0	0	0	0
	5	104.306	115.832	78.1227	80.2572		96.6217	76.1305	94.9141	0	73.996	112.702	87.7991	0	108.433	81.5379	105.871	101.033	0	0	70.4385	114.125	84.9531	100.179	0	111.421	72.8576	92.7796	0	100.606	113.982	84.6685	0	71.5769	88.3683	100.179	99.61	0	0	112.417	114.267	102.314	0	172.183	98.7562	97.9024	0	116.117	83.957
	6	97.1909	112.844	85.2377	77.5535		92.9219	93.7757	100.179	0	89.649	113.698	84.9531	0	107.436	73.5691	82.3917	100.179	0	0	65.6003	113.271	77.1266	98.187	0	114.125	77.4112	90.5028	0	89.7913	113.413	62.8966	0	80.8264	95.341	122.947	87.6568	0	0	0	0	0	0	0	0	0	0	115.121	0
	7	77.1266	116.544	63.3235	77.6958		93.7757	61.4736	99.1831	0	96.3371	115.121	86.2338	0	122.378	85.6646	92.0681	98.8985	0	0	78.6919	114.267	81.2533	99.8946	0	96.0525	75.5613	91.2143	0	88.9375	116.686	68.4463	0	71.15	92.7796	106.725	78.265	0	0	113.555	112.986	99.61	0	169.337	100.464	103.025	0	114.978	85.2377
	8	98.4716	112.844	84.6685	72.8576		93.0642	74.5652	98.6139	0	87.0876	114.267	87.6568	0	104.306	83.957	85.2377	98.4716	0	0	85.9492	112.986	68.1617	81.6802	0	99.0408	73.1422	85.0954	0	72.4307	115.832	65.7426	0	71.0077	90.6451	92.0681	88.7952	0	0	0	0	0	0	0	0	0	0	0	0
	9	74.2806	114.836	69.3001	78.8342		94.4872	68.1617	96.0525	0	87.5145	115.832	87.5145	0	155.961	80.3995	89.2221	101.887	0	0	89.2221	114.125	73.7114	71.0077	0	109.571	66.0272	78.265	0	92.6373	115.121	72.573	0	89.7913	79.688	95.4833	78.265	0	0	112.559	116.117	99.8946	0	169.195	99.4677	98.8985	0	113.555	85.6646
	10	82.9609	112.702	90.6451	58.7699		109.429	79.9726	92.0681	0	84.8108	112.559	96.9063	0	128.07	83.957	104.306	115.975	0	0	93.918	115.263	82.6763	71.2923	0	113.129	77.9804	88.3683	0	99.1831	113.129	79.5457	0	102.598	66.4541	119.959	72.8576	0	0	0	0	0	0	0	0	0	0	0	0
	11	67.0233	114.694	74.5652	61.7582		79.688	53.6471	97.0486	0	66.5964	113.982	103.879	0	148.277	87.6568	96.1948	108.86	0	0	70.1539	112.844	72.4307	75.8459	0	54.9278	63.3235	71.15	0	85.6646	113.982	56.92	0	62.4697	75.8459	110.282	85.5223	0	0	114.552	114.552	99.7523	0	172.041	119.674	127.643	0	114.836	112.844
	12	80.2572	114.267	72.7153	59.4814		100.322	78.5496	105.444	0	114.125	112.417	115.975	0	106.867	83.6724	92.2104	100.037	0	0	95.6256	114.978	74.4229	59.0545	0	105.444	81.6802	77.5535	0	100.748	116.117	61.6159	0	90.6451	71.4346	96.4794	86.803	0	0	0	0	0	0	0	0	0	0	0	0
	13	91.6412	115.263	74.4229	60.1929		82.6763	81.6802	100.037	0	79.2611	115.548	110.282	0	152.546	85.2377	110.709	99.4677	0	0	86.2338	116.401	68.4463	61.0467	0	106.014	82.1071	81.9648	0	79.9726	113.84	64.3196	0	90.2182	73.996	115.548	95.341	0	0	114.836	112.417	59.4814	0	170.902	126.647	130.631	0	115.263	107.863
	14	55.9239	114.267	67.1656	61.3313		103.31	72.8576	91.2143	0	78.265	116.686	101.602	0	132.481	86.6607	110.994	103.31	0	0	76.842	114.694	70.2962	61.0467	0	137.32	68.1617	80.9687	0	90.6451	116.117	68.4463	0	76.1305	75.5613	114.694	76.842	0	0	0	0	0	0	0	0	0	0	0	0
	15	95.9102	112.702	80.1149	61.0467		126.078	72.0038	103.025	0	98.187	113.413	105.16	0	137.604	87.0876	108.433	97.4755	0	0	83.5301	113.555	75.9882	60.1929	0	100.037	80.8264	69.0155	0	90.7874	116.117	76.9843	0	89.649	76.842	104.021	84.8108	0	0	143.438	116.544	60.4775	0	172.468	129.92	128.639	0	115.69	116.259
	16	86.6607	116.401	82.8186	61.7582		98.7562	60.7621	97.1909	0	77.4112	115.832	96.0525	0	110.709	86.3761	100.179	87.2299	0	0	87.5145	114.409	69.0155	63.0389	0	104.306	68.0194	80.1149	0	88.3683	116.686	73.5691	0	103.452	86.5184	113.698	82.534	0	0	0	0	0	0	0	0	0	0	0	0
	17	76.5574	113.271	101.887	60.9044		113.982	77.5535	103.594	0	95.0564	116.259	96.9063	0	108.86	85.2377	90.5028	86.5184	0	0	94.3449	113.555	66.7387	61.9005	0	106.583	78.5496	82.2494	0	79.5457	114.125	71.15	0	95.7679	70.2962	113.982	82.8186	0	0	142.869	113.84	62.612	0	170.618	115.832	114.267	0	116.259	100.037
	18	82.1071	111.421	80.9687	61.4736		104.448	75.7036	116.259	0	82.1071	113.84	98.3293	0	124.37	87.6568	91.7835	102.314	0	0	83.957	112.702	74.4229	60.6198	0	94.0603	73.1422	71.0077	0	88.226	113.698	72.8576	0	86.0915	86.2338	112.844	75.5613	0	0	0	0	0	0	0	0	0	0	0	0
	19	70.1539	112.844	75.5613	59.3391		91.6412	67.8771	110.14	0	76.6997	115.121	97.1909	0	135.754	87.7991	71.5769	88.5106	0	0	80.1149	115.263	68.0194	63.7504	0	86.9453	72.9999	73.7114	0	82.6763	113.129	60.0506	0	69.3001	81.3956	89.2221	82.6763	0	0	141.304	114.552	62.612	0	170.76	113.271	116.259	0	115.405	100.322
	20	81.2533	115.405	64.1773	60.3352		91.2143	64.8888	86.3761	0	95.341	113.982	77.2689	0	113.129	87.5145	84.9531	76.6997	0	0	65.458	112.702	67.1656	60.0506	0	94.4872	62.7543	61.0467	0	99.3254	112.559	63.0389	0	81.5379	85.5223	96.0525	73.8537	0	0	0	0	0	0	0	0	0	0	0	0
	21	94.9141	114.409	81.3956	58.343		115.121	75.2767	104.733	0	79.2611	113.413	92.7796	0	119.674	87.0876	73.2845	87.5145	0	0	74.2806	114.125	68.1617	59.9083	0	98.3293	66.4541	62.612	0	90.5028	99.7523	83.957	0	81.8225	71.4346	96.4794	66.5964	0	0	142.869	115.263	60.6198	0	161.368	112.417	116.401	0	115.263	101.887
	22	76.1305	115.263	77.8381	59.766		116.117	64.3196	104.875	0	99.8946	113.129	98.187	0	120.243	87.9414	95.0564	65.6003	0	0	65.7426	114.836	75.7036	59.766	0	78.6919	77.4112	67.0233	0	72.7153	116.259	76.5574	0	86.2338	70.4385	105.729	75.1344	0	0	0	0	0	0	0	0	0	0	0	0
	23	71.8615	115.263	77.5535	60.9044		94.3449	70.7231	98.187	0	72.8576	115.832	92.3527	0	114.978	86.0915	89.649	66.881	0	0	65.0311	113.84	67.5925	59.4814	0	91.4989	76.1305	70.0116	0	72.9999	114.267	55.7816	0	89.5067	79.8303	92.9219	67.7348	0	0	141.162	114.552	59.4814	0	143.581	114.409	115.405	0	115.121	98.8985
	24	79.5457	113.413	81.111	61.189		110.282	68.8732	91.9258	0	79.2611	116.259	90.2182	0	100.037	86.3761	101.033	78.265	0	0	62.3274	115.405	74.1383	60.4775	0	90.6451	68.304	65.458	0	84.3839	116.117	48.8089	0	75.8459	75.1344	114.267	67.8771	0	0	0	0	0	0	0	0	0	0	0	0
	25	59.3391	114.694	69.4424	60.7621		101.175	59.0545	90.0759	0	83.5301	114.694	73.1422	0	121.382	86.5184	86.803	69.3001	0	0	68.1617	113.698	67.5925	61.9005	0	86.9453	65.7426	71.2923	0	81.5379	113.271	50.6588	0	83.8147	77.2689	116.117	66.3118	0	0	140.166	115.121	61.189	0	169.764	115.832	115.548	0	115.69	100.891
	26	87.6568	113.84	77.5535	62.0428		95.7679	67.3079	90.3605	0	74.2806	113.698	83.1032	0	129.778	84.6685	89.0798	72.4307	0	0	77.4112	114.267	71.4346	63.1812	0	83.8147	67.3079	66.5964	0	72.1461	113.555	71.5769	0	84.8108	74.1383	115.69	63.1812	0	0	0	0	0	0	0	0	0	0	0	0
	27	73.996	114.409	59.1968	61.9005		99.1831	67.3079	99.8946	0	81.3956	114.267	68.7309	0	121.24	86.6607	83.957	87.2299	0	0	86.9453	111.99	52.7933	61.9005	0	84.3839	72.4307	80.2572	0	77.4112	113.271	71.4346	0	69.0155	67.4502	110.14	65.8849	0	0	144.719	112.986	62.3274	0	170.475	113.129	112.559	0	112.986	99.1831
	28	73.7114	112.986	75.8459	63.7504		97.4755	64.035	82.8186	0	72.4307	116.401	72.2884	0	117.255	86.803	93.4911	90.0759	0	0	66.7387	115.548	70.2962	62.7543	0	86.0915	63.4658	73.7114	0	67.1656	116.117	71.0077	0	63.3235	73.996	92.9219	61.3313	0	0	0	0	0	0	0	0	0	0	0	0
g
	1	39.14	26.86	26.59	31.89		37.97	30.62	31.47		35.47	30.53	25.12		43.9	37.96	36.95	44.29			35.58	26.48	26.42	32.13		40.8	30.41	33.53		34.61	26.58	25.69		38.84	37.14	35.24	40.19			37.29	29.79	27.41		44.1	29.63	30.2		29.6	24.02
	2	36.78	27.92	26.86	31.84		35.86	32.22	32.99		35.21	30.62	25.43		44.01	38.73	40.99	45.17			35.38	25.06	27.77	35.39		40.75	31.78	35.41		34.75	27.67	26.21		38.03	36.4	37.76	41.79			34.7	31.09	29.25		44.39	31.77	32.56		30.62	25.03
	3	36.09	27.85	27.12	32.31		40.78	31.07	31.42		35.96	30.95	25.26		44.13	39.33	41.31	42.77			34.99	25.56	26.5	34.18		40.63	31.1	34		34.86	29.42	26.63		38.1	37.3	37.42	40.24			31.75	28.84	25.44		41.23	27.94	27.94		27.45	22.16
	4	36.57	26.62	28.1	33.02		41.15	32.87	32.86		36.82	25.51	25.48		43.53	39.33	41.13	44.56			36	28.12	28.17	34.38		41.08	31.95	34.94		33.56	28.5	27.06		38.54	37.9	38.01	41.02			34	29.25	28		44.18	30.68	31.24		28.21	24.48
	5	35.17	26.96	29.42	32.66		40.88	32.37	32.39		36.04	28.16	26.02		42.48	39.18	41.49	45.01			36.03	28.78	27.94	33.98		40.56	31.93	36.38		33.67	28.9	27.23		36.98	37.94	37.87	41.91			29.69	26.7	23.56		39.69	26.51	27.5		23.68	20.88
	6	36.3	27.29	29.23	32.94		40.97	33.45	32.55		35.42	28.22	25.75		42.66	39	41.01	45.43			35.17	31.17	29.21	35.43		41.42	32.28	35.89		33.88	28.5	27.25		36.32	37.35	37.36	41.73			32.35	29.59	28.52		42.82	29.02	30.08		29.73	22.78
	7	36.35	24.95	28.99	32.91		40.23	33.89	31.62		35.74	25.13	25.85		42.43	39.37	41.3	45.69			35.19	31.98	28.83	35.5		41.11	32.8	35.91		34.02	28.46	27.29		36.65	37.66	39.01	41.5			28.3	26.73	24.27		38.92	26.18	26.66		31.83	18.88
	8	36.28	26.68	29.37	33.26		39.52	33.05	31		36.21	26.72	25.65		43.15	39.95	41.67	45.65			36.47	31.48	28.33	36.27		40.65	32.65	36.35		33.5	27.38	27.68		35.76	38.35	38.07	40.79			30.96	29.78	27.7		41.78	29.21	30.63		32.5	22.59
	9	36.64	27.46	29.45	32.96		39.61	34.04	31.62		35.69	28.37	25.57		41.91	40.26	41.44	45.82			36.49	30.35	28.43	34.25		40.63	32.09	36.56		33.14	28.93	27.27		35.88	37.45	38.41	41.41			27.11	27.5	23.25		38.3	24.89	25.78		28.95	17.56
	10	36.16	25.07	29.54	32.98		39.31	33.8	31.56		36.31	26.04	26		42.06	40.13	41.77	46			37.15	30.84	28.76	34.44		40.8	32.25	36.52		34	28.45	28.42		36.88	37.24	38.42	41.3			29.24	28.92	27.42		41.55	28	29.5		30.39	23.2
	11	35.73	23.17	30.56	32.26		40.49	34.67	31.71		35.51	25	25.7		42.4	40.69	41.36	46.94			37.1	29.94	29.75	34.99		40.94	33.35	36.96		34.11	26.66	28.86		38.14	36.96	38.46	40.97			26.51	25.98	22.63		38.7	25.11	26.07		24.87	17.46
	12	32.84	25.54	29.76	32.64		36.47	33.4	32.84		32.45	26.37	26.71		38.78	40.97	41.27	47.4			32.83	30.36	29.38	35.07		35.22	32.99	37.27		30.93	27.54	27.16		33.26	37.38	38.6	41.9			28.02	27.87	27.86		39.12	30.52	30.71		28.97	23.25
	13	35.93	26.96	30.41	32.19		38.67	34.54	33.25		36.08	27.31	27.75		41.72	40.84	41.13	47.5			37.63	30.17	28.4	34.32		39.62	33.64	36.6		33.26	27	28.73		37.39	37.64	38.41	41.04			24.86	26.43	23.07		36.68	24.39	25.93		24.45	17.32
	14	35.09	24.67	29.8	31.74		37.26	34.48	32.15		35.27	27.21	27.34		41.31	41.07	41.84	48.07			37.34	29.61	29	33.39		40.55	33.8	36.96		33.31	28.2	28.15		37.15	37.07	39.7	41.66			26.5	27.74	23.49		41.35	29.87	31.6		26.92	23.99
	15	34.58	26.01	29.71	31.76		36.96	34.41	32.63		35.19	27.84	28.54		41.26	40.85	41.24	48.32			37	30.17	28.64	33.83		40.61	33.07	36.76		33.45	28.38	28.73		36.84	37.23	39.21	41.04			23.49	24.72	19.47		36.59	24.62	26.75		21.36	19.29
	16	35.55	27.05	30.14	31.94		38.68	35	32.86		35.81	29.01	27.4		41.49	41.51	41.32	48.16			37.41	30.37	29.04	33.71		40.56	33.8	37		34.07	28.61	29.3		37.72	37.56	39.62	41.72			26.93	27.49	22.83		40.99	30.05	30.13		28.15	24.78
	17	35.37	23.86	29.81	31.9		38.95	35.13	33.03		35.15	27.38	27.16		41.66	41.06	41.35	48.08			37.42	29.58	29.3	34.69		40.44	33.45	37.31		33.49	28	29.39		39.18	37.64	39.3	41.52			22.95	25.26	19.14		36.44	24.57	26.44		23.58	18.5
	18	36.1	25.72	30.35	32.44		39.27	36.02	33.11		36.51	28.51	28.23		41.56	40.45	41.35	48.46			37.79	31.05	29.36	34.7		40.96	33.68	37.38		34.03	29.27	28.73		39.03	37.51	39.65	41.86			30.1	27.39	22.64		40.89	28.67	29.51		28.1	23.05
	19	34.54	23.87	30.97	32.39		38.56	35.52	33.68		36.04	27.32	28.52		41.57	40.68	41.09	48.78			37.5	29.35	29.33	34.06		40.67	33.75	36.31		34.01	27.89	30.19		38.52	38.13	39.75	41.46			25.05	24.51	19.44		37.14	24.06	26.1		22.19	17.37
	20	34.12	26.09	31.14	32.31		38.61	35.82	34		35.5	29.49	28.85		42.22	41.67	40.79	48.62			37.77	30.18	29.13	33.69		40.13	33.68	37.08		33.32	28.92	29.13		37.85	38.48	39.56	41.75			31.43	27.21	22.39		41.62	28.14	29.4		27.41	22.69
	21	34.42	26.13	31.6	32.63		37.85	35.93	34.87		35.79	28.25	29.1		41.55	41.08	41.27	48.39			36.03	30.13	29.75	33.3		40.85	34.08	37.55		34.76	28.32	29.85		37.75	38.59	39.89	42.12			26.06	24.42	18.2		37.41	24.5	26.3		22.74	17.36
	22	36.42	27.82	31.77	32.03		39.06	36.7	34.83		35.57	28.91	29.64		42.84	41.49	41.26	48.02			36.73	30.25	29.85	32.75		40.26	35.35	37.25		34.38	27.87	31.65		37.83	38.26	40.14	41.55			32.26	27.6	21.03		41.97	28.9	30.43		26.37	23.83
	23	34.9	25.79	31.49	32.2		39.21	36.05	35.33		36.43	28.23	30.73		42.13	41.03	41.19	47.12			35.57	30.25	27.93	32.42		39.86	33.96	37.51		34.02	28.12	31.1		38.09	38.8	40.61	41.36			27.01	25.43	17.94		37.74	23.83	25.92		22.83	17.5
	24	35.05	26.98	31.75	32.23		38.87	36.66	35.4		35.96	29	30.33		42.46	40.89	41.75	46.88			35.34	31.09	29.35	32.68		39.99	34.91	37.12		34.42	27.85	28.33		39.67	39.12	40.32	41.88			32.5	28.06	21.45		41.74	29.23	30.07		27.05	23.37
	25	35	26.43	32.26	32.18		38.81	37.29	35.81		36.5	27.86	31.4		41.56	40.35	40.82	47.05			35.38	29.68	29.7	32.8		40.41	34.77	36.96		34.98	28.35	29.88		39.13	38.51	39.89	40.96			28.55	25.09	17.34		38.54	24.72	26.47		22	17.65
	26	34.41	27.9	32.07	32.56		37.73	36.83	36.41		35.86	29.08	30.41		42.17	39.79	41	47.06			35.38	30.66	29.49	33.07		40.14	34.3	37.32		34.02	28.7	29.26		39.25	38.52	40.36	41			30.74	27.44	21.58		42.14	29.3	29.11		26.17	23.1
	27	35.81	28.45	31.75	32.61		38.47	37.41	36.27		35.99	29.89	30.57		42.61	40.36	41.07	46.87			36.55	30.9	30.04	31.91		39.93	34.57	37.29		33.91	28.6	30.46		39.73	38.96	40.48	41.52			27.82	24.8	17.94		38.11	25.14	25.94		23.32	17.48
	28	35.49	26.09	31.52	32.83		38.07	37.64	35.92		35.76	29.89	28.56		42.03	41.03	41.67	47.49			37.6	30.98	28.1	32.51		39.86	34.6	38.48		34.03	29.11	31.13		38.92	38.8	40.16	41.38			31.23	27.1	21.83		43.21	29.7	28.31		24.58	22.48
KJ/g
	1	1.62878	4.29125	3.17352	2.64609		2.18116	2.40265	3.24663		1.60474	3.76608	3.38756		3.91892	2.73279	4.32099	2.30366			1.91173	1.94534	3.25857	2.69276		2.33679	2.23674	2.35115		2.46692	4.32575	2.17134		3.45858	2.19925	3.43232	2.52451			3.07954	3.85008	3.06301		3.90115	2.92956	3.124		3.8796	3.0806
	2	2.72761	4.03149	3.1893	2.75751		3.21425	3.10922	3.01077		3.24934	3.79219	3.40222		3.81859	2.00241	3.07582	2.23673			2.03113	2.83919	3.13091	2.42461		2.29426	2.40898	2.2424		3.36606	4.19649	3.26296		2.42842	2.31042	3.50474	1.85579
	3	2.45644	4.15915	3.06952	2.56325		2.78459	2.39075	3.09781		2.90852	3.76095	3.27301		3.83723	2.21066	2.48706	2.37888			2.29372	4.43713	3.16819	2.49379		2.45514	2.50283	2.43584		1.44504	3.8985	2.50615		2.46504	2.60947	3.79137	1.94849			3.53173	3.91769	3.3002		4.17616	3.63135	3.5957		4.1731	3.86573
	4	1.89889	4.3834	3.03843	2.62018		2.86675	1.77929	2.63294		2.73624	4.47372	3.34528		2.60867	1.83076	3.06535	2.26415			2.05544	3.79534	2.95511	2.83938		2.52524	2.06658	2.37438		2.90027	3.99439	2.51365		1.6246	2.33162	2.68427	2.22019
	5	2.96576	4.29645	2.65543	2.45735		2.36354	2.35188	2.93035		2.05316	4.00219	3.37429		2.55256	2.08111	2.55173	2.24468			1.955	3.96541	3.04055	2.94818		2.74706	2.28179	2.55029		2.988	3.94402	3.10938		1.93556	2.32916	2.64534	2.37676			3.78636	4.27966	4.34269		4.3382	3.72524	3.56009		4.90358	4.02093
	6	2.67744	4.13499	2.9161	2.35439		2.26805	2.80346	3.0777		2.53103	4.02898	3.29915		2.51844	1.88639	2.00906	2.20513			1.86523	3.63397	2.64042	2.7713		2.7553	2.39812	2.52167		2.65027	3.97941	2.30813		2.2254	2.55264	3.29088	2.10057
	7	2.12178	4.67109	2.18432	2.36086		2.33099	1.81392	3.13672		2.6955	4.58101	3.33593		2.88423	2.17589	2.22925	2.16455			2.2362	3.57307	2.81836	2.81393		2.33648	2.3037	2.54008		2.61427	4.1	2.50811		1.94134	2.46361	2.73584	1.8859			4.01256	4.22694	4.10424		4.3509	3.83743	3.86441		3.61227	4.51471
	8	2.71421	4.22953	2.88282	2.19055		2.35486	2.25613	3.18109		2.40507	4.27646	3.41742		2.41729	2.10155	2.04554	2.1571			2.35671	3.58914	2.40599	2.252		2.43643	2.24019	2.341		2.16211	4.23054	2.37509		1.98567	2.36363	2.41839	2.17689
	9	2.02731	4.18194	2.35314	2.39181		2.38544	2.0024	3.03771		2.45207	4.08291	3.42255		3.72133	1.99701	2.15304	2.22363			2.44511	3.76028	2.59273	2.07322		2.6968	2.05756	2.14073		2.79533	3.97928	2.66128		2.50254	2.12785	2.4859	1.89			4.15195	4.22243	4.29654		4.41762	3.99629	3.83625		3.92247	4.87839
	10	2.29427	4.49548	3.06855	1.78199		2.78374	2.36605	2.91724		2.33574	4.32255	3.72717		3.04494	2.09213	2.49715	2.52118			2.52808	3.73745	2.8747	2.07004		2.77276	2.418	2.41972		2.91715	3.9764	2.79893		2.78195	1.78448	3.1223	1.76411
	11	1.87583	4.9501	2.43996	1.91439		1.96809	1.54736	3.0605		1.87543	4.55929	4.04198		3.49709	2.15426	2.32579	2.31912			1.89094	3.769	2.43465	2.16765		1.34167	1.89876	1.92505		2.51142	4.27541	1.97228		1.63791	2.05211	2.86746	2.08744			4.32107	4.40922	4.40797		4.4455	4.766	4.89617		4.61745	6.463
	12	2.44389	4.47404	2.44339	1.82235		2.7508	2.35178	3.21085		3.51694	4.26306	4.34199		2.75573	2.04228	2.23432	2.11048			2.91275	3.78717	2.53311	1.6839		2.99388	2.47591	2.08086		3.2573	4.2163	2.26863		2.72535	1.91104	2.49947	2.07167
	13	2.55055	4.27533	2.44732	1.86993		2.138	2.3648	3.00863		2.19682	4.23096	3.97414		3.65641	2.08711	2.69169	2.09406			2.29162	3.85818	2.41008	1.77875		2.67576	2.44076	2.23948		2.40447	4.2163	2.23876		2.4129	1.96589	3.00827	2.32312			4.61931	4.25339	2.5783		4.65928	5.19258	5.03785		4.71423	6.22768
	14	1.59373	4.63182	2.25388	1.9323		2.77267	2.11304	2.83715		2.21902	4.28835	3.71625		3.207	2.11007	2.65282	2.14915			2.0579	3.87348	2.42401	1.82829		3.38642	2.01662	2.19071		2.72126	4.11762	2.43148		2.04927	2.03834	2.88901	1.8445
	15	2.77357	4.33301	2.69656	1.92213		3.4112	2.09253	3.15738		2.7902	4.07375	3.68464		3.33505	2.13189	2.62931	2.01729			2.25757	3.76385	2.65322	1.77928		2.46336	2.4441	1.87746		2.71412	4.0915	2.67958		2.43347	2.06398	2.65293	2.06654			6.10636	4.71455	3.10619		4.71352	5.27701	4.80894		5.41619	6.02691
	16	2.43771	4.30319	2.7478	1.93357		2.55316	1.73606	2.95773		2.16172	3.99284	3.50557		2.66834	2.08085	2.42447	1.81125			2.33933	3.76718	2.37657	1.87004		2.57164	2.01241	2.16527		2.59373	4.0785	2.51089		2.74263	2.30347	2.8697	1.97828
	17	2.16447	4.74731	3.41787	1.90923		2.92637	2.20761	3.13637		2.70431	4.24613	3.56798		2.61305	2.07593	2.1887	1.79947			2.52124	3.83892	2.27777	1.78439		2.63558	2.34827	2.20449		2.37521	4.07588	2.42089		2.44431	1.86759	2.90031	1.99467			6.22524	4.50673	3.27126		4.68215	4.71438	4.32174		4.93041	5.4074
	18	2.27443	4.33207	2.66783	1.89499		2.65975	2.10171	3.5113		2.24889	3.99298	3.48315		2.99255	2.16704	2.21967	2.1113			2.22167	3.62968	2.53484	1.74697		2.29639	2.17168	1.89962		2.59259	3.88444	2.53594		2.20578	2.29895	2.846	1.8051
	19	2.03109	4.72744	2.43982	1.83202		2.37659	1.91095	3.2702		2.12818	4.21379	3.40782		3.26568	2.15829	1.74195	1.81449			2.1364	3.92719	2.31911	1.87171		2.13782	2.16296	2.03006		2.43094	4.05624	1.98909		1.79907	2.13469	2.24458	1.99412			5.64087	4.67366	3.22078		4.59774	4.70785	4.45437		5.20078	5.77556
	20	2.3814	4.42335	2.06093	1.86738		2.36245	1.81152	2.54047		2.68566	3.86512	2.6783		2.6795	2.10018	2.08269	1.57753			1.73307	3.73431	2.30572	1.78245		2.35453	1.86325	1.64635		2.98095	3.89209	2.16405		2.15424	2.22251	2.42802	1.76895
	21	2.75753	4.37846	2.57581	1.78802		3.0415	2.09509	3.00352		2.21462	4.01462	3.1883		2.88025	2.11995	1.77573	1.80852			2.06163	3.78774	2.29115	1.79905		2.40708	1.94994	1.66743		2.60365	3.52233	2.81263		2.16748	1.85112	2.41864	1.58111			5.48232	4.72002	3.33076		4.3135	4.58845	4.42591		5.06873	5.86906
	22	2.09035	4.14317	2.45005	1.86594		2.97278	1.75258	3.01106		2.80839	3.91313	3.31265		2.8068	2.11958	2.30384	1.3661			1.78989	3.79623	2.53613	1.82492		1.95459	2.18985	1.79928		2.11505	4.17148	2.41888		2.27951	1.84105	2.634	1.80829
	23	2.05907	4.46929	2.4628	1.89144		2.40614	1.96181	2.77914		1.99993	4.10316	3.00529		2.72913	2.09826	2.17647	1.41938			1.82826	3.76331	2.42007	1.83471		2.29551	2.24177	1.86648		2.14579	4.06355	1.79362		2.34987	2.05748	2.28815	1.63769			5.22627	4.50458	3.31557		3.80447	4.80106	4.45236		5.04252	5.65134
	24	2.26949	4.2036	2.55468	1.89851		2.83721	1.8787	2.59677		2.20415	4.00893	2.97455		2.35603	2.1124	2.41995	1.66948			1.76365	3.71197	2.52601	1.8506		2.26669	1.95657	1.76342		2.4516	4.16936	1.72287		1.91192	1.92061	2.834	1.62075
	25	1.6954	4.33953	2.15259	1.88819		2.60694	1.58366	2.51538		2.2885	4.11679	2.32937		2.92064	2.1442	2.12648	1.4729			1.92656	3.83079	2.27584	1.88721		2.15158	1.89079	1.9289		2.33099	3.99544	1.69541		2.14196	2.00646	2.91093	1.61894			4.90947	4.58831	3.52878		4.40488	4.68577	4.36523		5.25863	5.71619
	26	2.54742	4.08029	2.41826	1.90549		2.53824	1.82753	2.48175		2.07141	3.90982	2.73276		3.07749	2.12788	2.17268	1.53911			2.18799	3.7269	2.42233	1.91053		2.08806	1.96233	1.78447		2.1207	3.95663	2.44624		2.16078	1.92467	2.86645	1.541
	27	2.06635	4.02141	1.86447	1.89821		2.57819	1.7992	2.75419		2.26162	3.82291	2.24831		2.84533	2.14719	2.04424	1.8611			2.3788	3.62428	1.75743	1.93985		2.1133	2.09519	2.15224		2.28284	3.96052	2.34519		1.73711	1.73127	2.72085	1.58682			5.20198	4.5559	3.47421		4.47325	4.49994	4.33922		4.84503	5.67409
	28	2.07696	4.33063	2.40628	1.94183		2.56043	1.70125	2.30564		2.02547	3.89433	2.53111		2.7898	2.1156	2.24361	1.89673			1.77497	3.72975	2.50164	1.93031		2.15985	1.83427	1.91558		1.97372	3.9889	2.28101		1.62702	1.90711	2.31379	1.48215
[truncated: 24 more columns]
